# Supplementary material for: Heterometallic hexanuclear Ni4M2 (M = Dy, Y) complexes: structure and single-molecule magnet for the Dy(iii) derivative
Source: Royal Society of Chemistry journal article supplement (doi:10.1039/c7dt04003b), 2018-01-01
Supplement: c7dt04003b1.pdf [file c7dt04003b1.pdf]

## **Heterometallic hexanuclear Ni<sub>4</sub>M<sub>2</sub> (M = Dy, Y) complexes: structure and single-molecule magnet for the Dy(III) derivative**

Shaomin Pei,<sup>a</sup> Zhaobo Hu,<sup>a</sup> Zilu Chen,<sup>\*,a</sup> Shui Yu,<sup>a</sup> Bo Li,<sup>\*,b</sup> Yuning Liang,<sup>a</sup> Dongcheng Liu,<sup>a</sup> Di Yao<sup>a</sup> and Fupei Liang<sup>\*,a,c</sup>

<sup>a</sup> State Key Laboratory for Chemistry and Molecular Engineering of Medicinal Resources, School of Chemistry and Pharmaceutical Sciences, Guangxi Normal University, Guilin 541004, P. R. China. E-mail: zlchen@mailbox.gxnu.edu.cn; fliangoffice@yahoo.com

<sup>b</sup> College of Chemistry and Pharmaceutical Engineering, Nanyang Normal University, Nanyang 473061, P. R. China. E-mail: libozzu0107@163.com

<sup>c</sup> Guangxi Key Laboratory of Electrochemical and Magnetochemical Functional Materials, College of Chemistry and Bioengineering, Guilin University of Technology, Guilin, 541004, P. R. China. E-mail: fliangoffice@yahoo.com

### **Electronic Supplementary Information**

**Table S1** Selected bond lengths / Å and bond angles / ° for **1**.

|            |            |              |            |               |            |
|------------|------------|--------------|------------|---------------|------------|
| Dy1-O9     | 2.266(3)   | O5-Dy1-O3    | 85.62(11)  | O7-Ni1-O5     | 175.53(11) |
| Dy1-O5     | 2.311(3)   | O10-Dy1-O3   | 155.59(10) | N1-Ni1-O5     | 88.02(13)  |
| Dy1-O10    | 2.378(3)   | O2-Dy1-O3    | 81.99(13)  | N4A-Ni1-O5    | 84.24(13)  |
| Dy1-O2     | 2.402(3)   | O9-Dy1-O4    | 80.40(11)  | O11A-Ni1-O5   | 79.07(11)  |
| Dy1-O3     | 2.406(3)   | O5-Dy1-O4    | 117.06(12) | O10-Ni1-O5    | 85.41(11)  |
| Dy1-O4     | 2.410(3)   | O10-Dy1-O4   | 150.64(10) | O9-Ni2-O9A    | 84.90(11)  |
| Dy1-O1     | 2.454(3)   | O2-Dy1-O4    | 93.18(12)  | O9-Ni2-N3     | 93.07(12)  |
| Dy1-O11A   | 2.461(3)   | O3-Dy1-O4    | 53.71(11)  | O9A-Ni2-N3    | 166.49(12) |
| Dy1-Ni1    | 3.0968(6)  | O9-Dy1-O1    | 125.02(10) | O9-Ni2-N2     | 164.80(13) |
| Dy1-Ni2    | 3.3985(6)  | O5-Dy1-O1    | 76.60(10)  | O9A-Ni2-N2    | 93.18(12)  |
| Ni1-O7     | 2.037(3)   | O10-Dy1-O1   | 79.87(10)  | N3-Ni2-N2     | 92.18(14)  |
| Ni1-N1     | 2.055(3)   | O2-Dy1-O1    | 53.64(10)  | O9-Ni2-O11    | 93.93(11)  |
| Ni1-N4A    | 2.063(4)   | O3-Dy1-O1    | 78.67(12)  | O9A-Ni2-O11   | 83.82(10)  |
| Ni1-O11A   | 2.094(3)   | O4-Dy1-O1    | 126.59(11) | N3-Ni2-O11    | 83.00(12)  |
| Ni1-O10    | 2.100(3)   | O9-Dy1-O11A  | 72.17(9)   | N2-Ni2-O11    | 100.86(13) |
| Ni1-O5     | 2.256(3)   | O5-Dy1-O11A  | 70.95(9)   | O9-Ni2-O10    | 82.57(10)  |
| Ni2-O9     | 2.048(3)   | O10-Dy1-O11A | 71.83(9)   | O9A-Ni2-O10   | 92.35(10)  |
| Ni2-O9A    | 2.048(3)   | O2-Dy1-O11A  | 153.13(10) | N3-Ni2-O10    | 100.64(12) |
| Ni2-N3     | 2.102(3)   | O3-Dy1-O11A  | 119.89(12) | N2-Ni2-O10    | 82.44(12)  |
| Ni2-N2     | 2.102(3)   | O4-Dy1-O11A  | 88.98(11)  | O11-Ni2-O10   | 175.05(10) |
| Ni2-O11    | 2.125(3)   | O1-Dy1-O11A  | 140.37(9)  | Ni1-O5-Dy1    | 85.39(10)  |
| Ni2-O10    | 2.128(3)   | O7-Ni1-N1    | 96.31(14)  | Ni1-O10-Dy1   | 87.27(9)   |
| Ni2-Dy1A   | 3.4352(5)  | O7-Ni1-N4A   | 95.76(14)  | Ni1A-O11-Dy1A | 85.27(9)   |
|            |            | N1-Ni1-N4A   | 103.85(14) | Ni2-O9-Dy1    | 103.86(11) |
| O9-Dy1-O5  | 138.49(10) | O7-Ni1-O11A  | 96.48(11)  | Ni2A-O9-Dy1   | 105.43(11) |
| O9-Dy1-O10 | 72.77(9)   | N1-Ni1-O11A  | 163.92(13) | Ni2-O10-Dy1   | 97.76(10)  |
| O5-Dy1-O10 | 78.18(10)  | N4A-Ni1-O11A | 84.51(12)  | Ni2-O11-Dy1A  | 96.74(10)  |
| O9-Dy1-O2  | 81.78(10)  | O7-Ni1-O10   | 93.91(11)  | Ni2-O9-Ni2A   | 95.11(11)  |
| O5-Dy1-O2  | 130.13(10) | N1-Ni1-O10   | 84.23(12)  | Ni1-O10-Ni2   | 126.51(12) |
| O10-Dy1-O2 | 94.54(10)  | N4A-Ni1-O10  | 166.61(13) | Ni1A-O11-Ni2  | 124.93(14) |
| O9-Dy1-O3  | 129.94(10) | O11A-Ni1-O10 | 85.21(10)  |               |            |

Symmetry code: A)  $0.5 - x, 0.5 - y, -z$ .

**Table S2** Selected bond lengths / Å and bond angles / ° for **2**.

|           |            |              |            |              |           |
|-----------|------------|--------------|------------|--------------|-----------|
| Y1-O9     | 2.2495(18) | O5-Y1-O3     | 85.71(8)   | O7-Ni1-O5    | 175.27(8) |
| Y1-O5     | 2.3003(19) | O10-Y1-O3    | 155.18(7)  | N1-Ni1-O5    | 88.15(9)  |
| Y1-O10    | 2.3579(18) | O2-Y1-O3     | 81.29(9)   | N4A-Ni1-O5   | 84.49(9)  |
| Y1-O2     | 2.389(2)   | O9-Y1-O4     | 80.36(7)   | O11A-Ni1-O5  | 78.79(7)  |
| Y1-O3     | 2.390(2)   | O5-Y1-O4     | 116.33(8)  | O10-Ni1-O5   | 84.83(7)  |
| Y1-O4     | 2.396(2)   | O10-Y1-O4    | 150.93(7)  | O9A-Ni2-O9   | 84.91(7)  |
| Y1-O1     | 2.446(2)   | O2-Y1-O4     | 93.38(9)   | O9A-Ni2-N3   | 165.99(8) |
| Y1-O11A   | 2.4502(18) | O3-Y1-O4     | 53.83(8)   | O9-Ni2-N3    | 93.05(9)  |
| Y1-Ni1    | 3.0904(5)  | O9-Y1-O1     | 125.17(7)  | O9A-Ni2-N2   | 93.40(9)  |
| Y1-Ni2    | 3.3841(5)  | O5-Y1-O1     | 76.63(7)   | O9-Ni2-N2    | 164.28(8) |
| Ni1-O7    | 2.031(2)   | O10-Y1-O1    | 79.63(7)   | N3-Ni2-N2    | 92.23(10) |
| Ni1-N1    | 2.055(2)   | O2-Y1-O1     | 53.92(7)   | O9A-Ni2-O11  | 83.46(7)  |
| Ni1-N4A   | 2.060(3)   | O3-Y1-O1     | 78.30(8)   | O9-Ni2-O11   | 94.13(7)  |
| Ni1-O11A  | 2.1004(18) | O4-Y1-O1     | 126.84(8)  | N3-Ni2-O11   | 82.87(8)  |
| Ni1-O10   | 2.1018(18) | O9-Y1-O11A   | 72.23(6)   | N2-Ni2-O11   | 101.21(8) |
| Ni1-O5    | 2.253(2)   | O5-Y1-O11A   | 71.13(7)   | O9A-Ni2-O10  | 92.87(7)  |
| Ni2-O9A   | 2.0460(18) | O10-Y1-O11A  | 72.33(6)   | O9-Ni2-O10   | 82.28(7)  |
| Ni2-O9    | 2.0473(18) | O2-Y1-O11A   | 153.17(7)  | N3-Ni2-O10   | 100.60(8) |
| Ni2-N3    | 2.102(2)   | O3-Y1-O11A   | 120.15(8)  | N2-Ni2-O10   | 82.20(8)  |
| Ni2-N2    | 2.103(2)   | O4-Y1-O11A   | 88.23(7)   | O11-Ni2-O10  | 175.10(7) |
| Ni2-O11   | 2.1216(18) | O1-Y1-O11A   | 140.66(7)  | Ni1-O5-Y1    | 85.47(7)  |
| Ni2-O10   | 2.1347(18) | O7-Ni1-N1    | 96.40(10)  | Ni1-O10-Y1   | 87.53(6)  |
| Ni2-Dy1A  | 3.4265(4)  | O7-Ni1-N4A   | 95.66(10)  | Ni1A-O11-Y1A | 85.19(6)  |
|           |            | N1-Ni1-N4A   | 103.76(10) | Ni2-O9-Y1    | 103.82(7) |
| O9-Y1-O5  | 138.84(7)  | O7-Ni1-O11A  | 96.51(8)   | Ni2A-O9-Y1   | 105.72(8) |
| O9-Y1-O10 | 73.32(6)   | N1-Ni1-O11A  | 163.80(9)  | Ni2-O10-Y1   | 97.62(7)  |
| O5-Y1-O10 | 78.25(7)   | N4A-Ni1-O11A | 84.64(9)   | Ni2-O11-Y1A  | 96.83(7)  |
| O9-Y1-O2  | 81.63(7)   | O7-Ni1-O10   | 94.29(8)   | Ni2A-O9-Ni2  | 95.09(7)  |
| O5-Y1-O2  | 130.41(7)  | N1-Ni1-O10   | 84.34(9)   | Ni1-O10-Ni2  | 126.03(8) |
| O10-Y1-O2 | 94.75(7)   | N4A-Ni1-O10  | 166.36(9)  | Ni1A-O11-Ni2 | 125.04(9) |
| O9-Y1-O3  | 129.54(7)  | O11A-Ni1-O10 | 84.97(7)   |              |           |

Symmetry code: A)  $0.5 - x, 0.5 - y, -z$ .

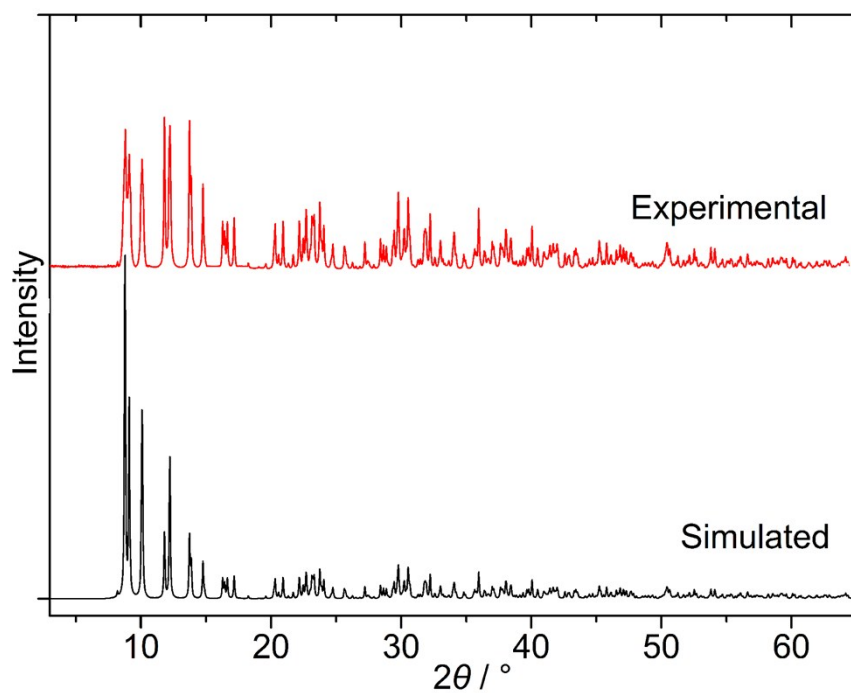

**Fig. S1** PXR D patterns of 1.

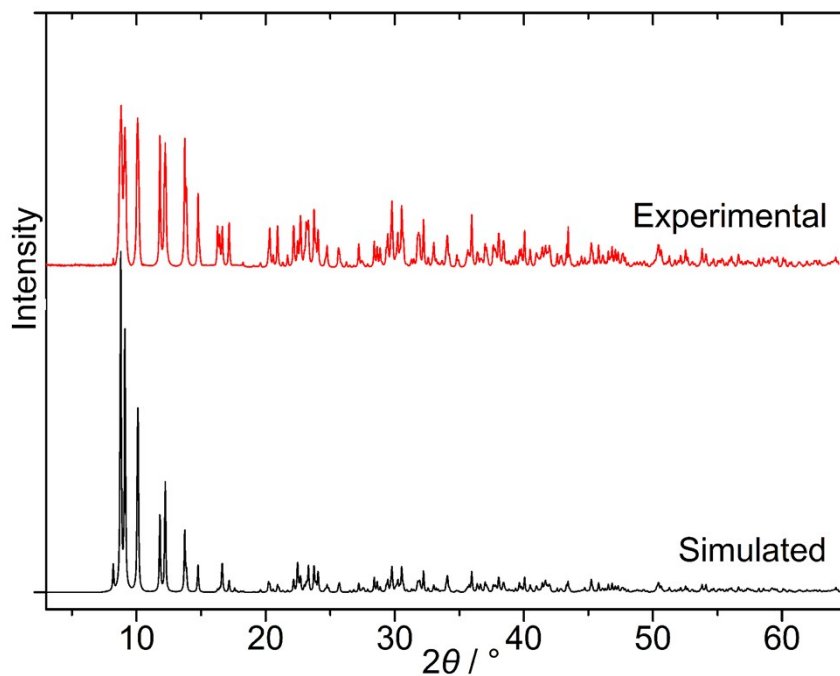

**Fig. S2** PXR D patterns of 2.

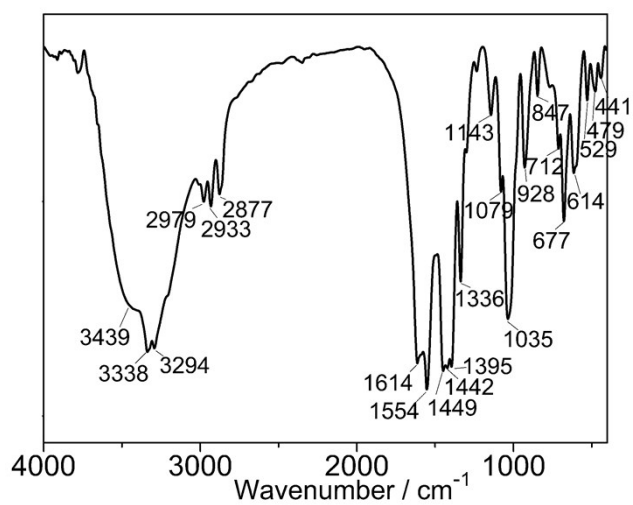

**Fig. S3** FT-IR spectrum of complex 1.

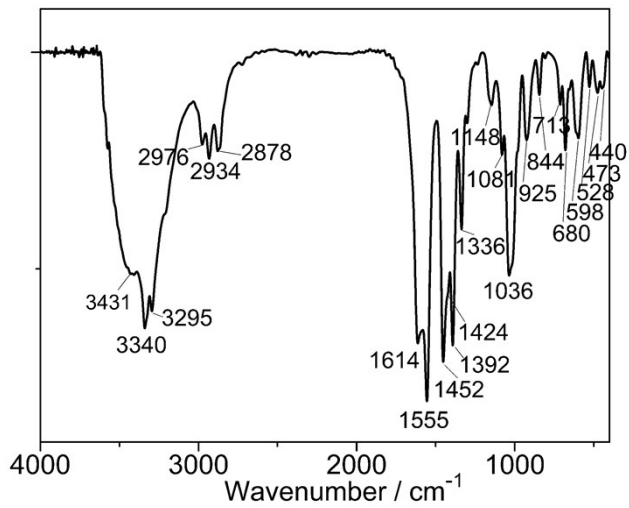

**Fig. S4** FT-IR spectrum of complex 2.

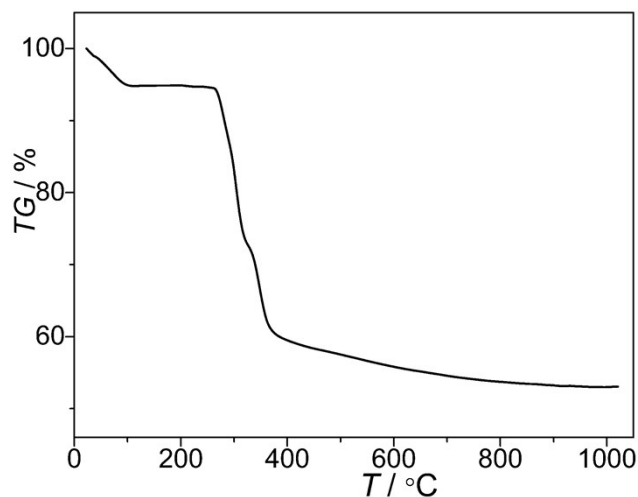

**Fig. S5** TG curve of complex **1**. It reveals a weight loss of 5.2% before 110 °C, which corresponds to the loss of one water molecule and one mono-dentate coordinated acetate ion (5.35%). After a platform in the temperature range of 110-260 °C, complex **1** underwent a fast weight loss before 370 °C, and then a much slow weight loss, which is ascribed to the collapse of the skeleton of complex **1**.

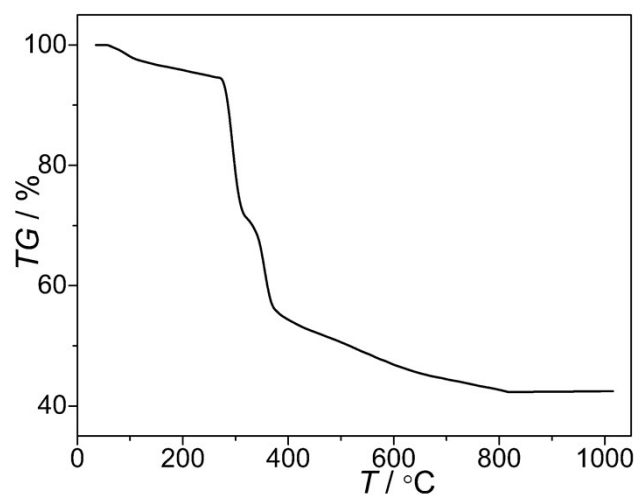

**Fig. S6** TG curve of complex **2**. It reveals a slow weight loss of 5.45% before 270 °C, which corresponds to the loss of one water molecule and one mono-dentate coordinated acetate ion (5.26%). Then it underwent a fast weight loss before 380 °C with a followed slow weight loss, which is ascribed to the collapse of the skeleton of complex **2**.

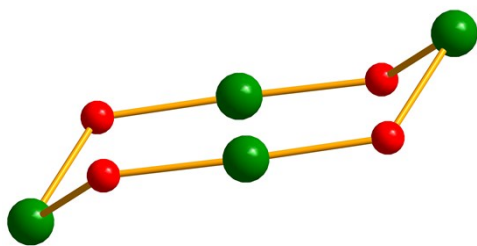

**Fig. S7** A “distortion chair” like in the  $\text{Ni}_4\text{O}_4$  core.

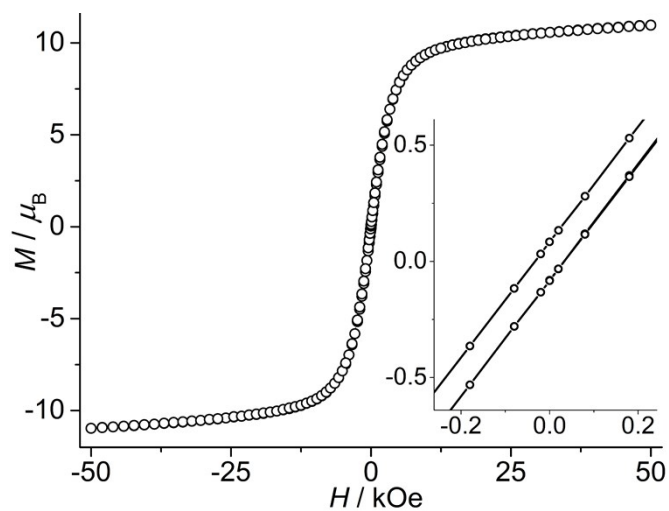

**Fig. S8** Plots of Magnetic hysteresis loops for **1**.

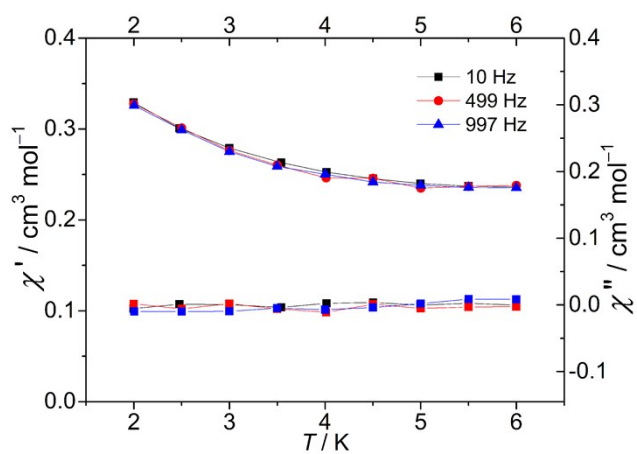

**Fig. S9**  $\chi'$ - $T$  and  $\chi''$ - $T$  plots for **2** with  $H_{\text{dc}} = 0$  Oe and  $H_{\text{ac}} = 3$  Oe.
